# Supplementary material for: Silver nanoparticles: a novel radiation sensitizer for glioma?
Source: Royal Society of Chemistry journal article supplement (doi:10.1039/c3nr01351k), 2013-01-01
Supplement: c3nr01351k.pdf [file c3nr01351k.pdf]

**Supplementary information:**

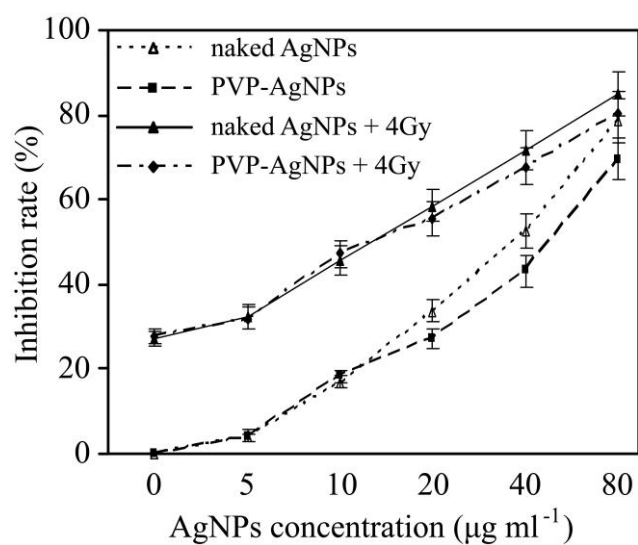

**Figure S1. Effects of naked and PVP-coated AgNPs on C6 glioma cell viability with or without ionizing radiation.** C6 cells were incubated for 24 h with varying concentrations of AgNPs. At 48 h after radiation treatment, the cell inhibitory rate was determined using a Cell Counting Kit-8. The data were a summary of three independent experiments and expressed as the means  $\pm$  SEM.

**Table S1**

Survival times of C6 glioma-bearing rats following intratumoral administration of AgNPs

| Group               | No. of rats | Range | Survival times (days) |        | % Increased life span |        |
|---------------------|-------------|-------|-----------------------|--------|-----------------------|--------|
|                     |             |       | Mean $\pm$ SEM        | Median | Mean                  | Median |
| Untreated control   | 9           | 14-19 | 16.4 $\pm$ 0.5        | 16.5   |                       |        |
| 5 $\mu$ g of AgNPs  | 8           | 14-20 | 16.3 $\pm$ 0.6        | 16.5   | -0.6                  | 0      |
| 40 $\mu$ g of AgNPs | 8           | 18-29 | 22.8 $\pm$ 1.2        | 22.5   | 39.0                  | 36.4   |

**Table S2**

Percentage loss in body weight 3 days and 7 days after AgNPs treatment of C6 glioma

| Group          | 3 days     | 7 days     |
|----------------|------------|------------|
| 5 µg of AgNPs  | -3.5 ± 0.4 | 1.8 ± 0.2  |
| 40 µg of AgNPs | -2.8 ± 0.3 | -0.6 ± 0.2 |

Values are the means ± SEM of determinations in 5-8 animals of each group.
